# Supplementary material for: A cooperative afterglow enhancement in the second biological window of Na2CaSn2Ge3O12with co-doping of Pr3+–Yb3+
Source: Royal Society of Chemistry journal article supplement (doi:10.1039/d1tc03286k), 2021-01-01
Supplement: d1tc03286k1.pdf [file d1tc03286k1.pdf]

## Supporting Information

### A Cooperative Afterglow Enhancement in Second Biological Window of $\text{Na}_2\text{CaSn}_2\text{Ge}_3\text{O}_{12}$ with Co-doping of $\text{Pr}^{3+}$ - $\text{Yb}^{3+}$

Xiuping Gao<sup>\*abc</sup>, Tao Liu<sup>a</sup>, Xiaohui Jiang<sup>a</sup>, Kai Huang<sup>c</sup>, Runlin Liu<sup>a</sup>, Jinyuan Zhou<sup>a</sup>, Erqing Xie<sup>a</sup>, Yang Li<sup>d</sup>, Weisheng Liu<sup>b</sup>, Min Wang<sup>\*c</sup>, Gang Han<sup>\*c</sup>

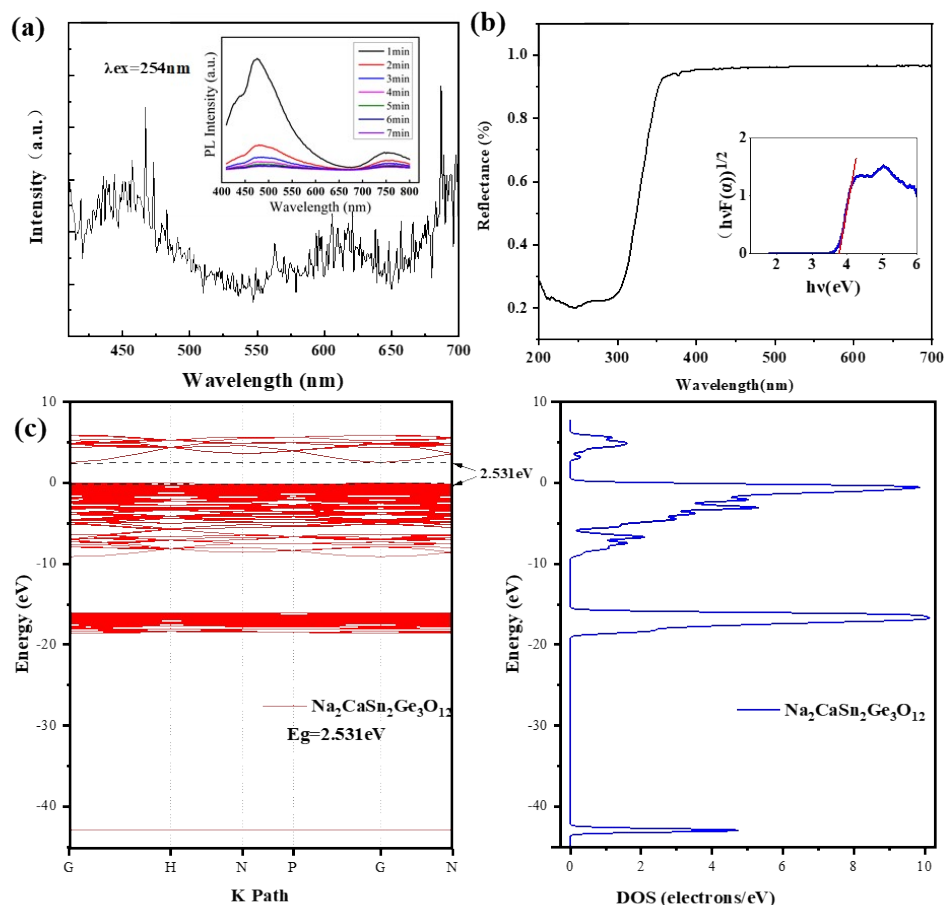

Figure S1. (a) PL spectra of NCSGO excited at 254nm, inset is the LPL decay spectra of NCSGO at different decay times, (b) DRS test result of NCSGO, (c) Band gap of NCSGO calculated according to density functional theory.

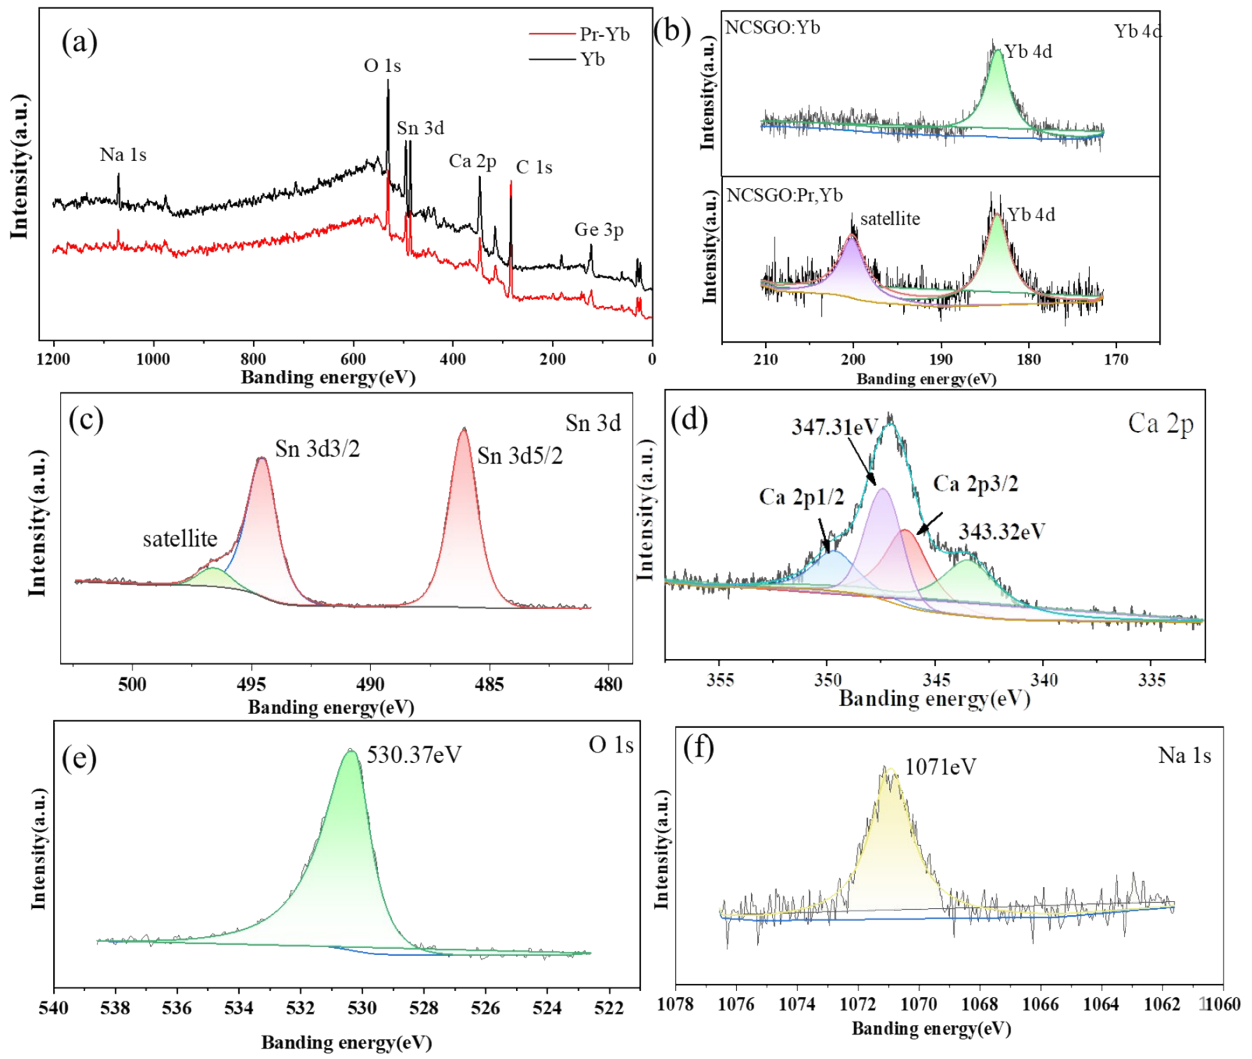

Figure S2. (a) XPS survey wide scan spectrum of NCSGO: 0.8%Yb<sup>3+</sup> and NCSGO: 0.8%Pr<sup>3+</sup>, 0.8%Yb<sup>3+</sup>, (b) XPS narrow scan spectrum of Yb4d of NCSGO: 0.8%Yb<sup>3+</sup> and NCSGO: 0.8%Pr<sup>3+</sup>, 0.8%Yb<sup>3+</sup>, (c-f) XPS narrow scan spectrum of Sn3d, Ca2p, O1s and Na1s of NCSGO: 0.8%Pr<sup>3+</sup>, 0.8%Yb<sup>3+</sup>.

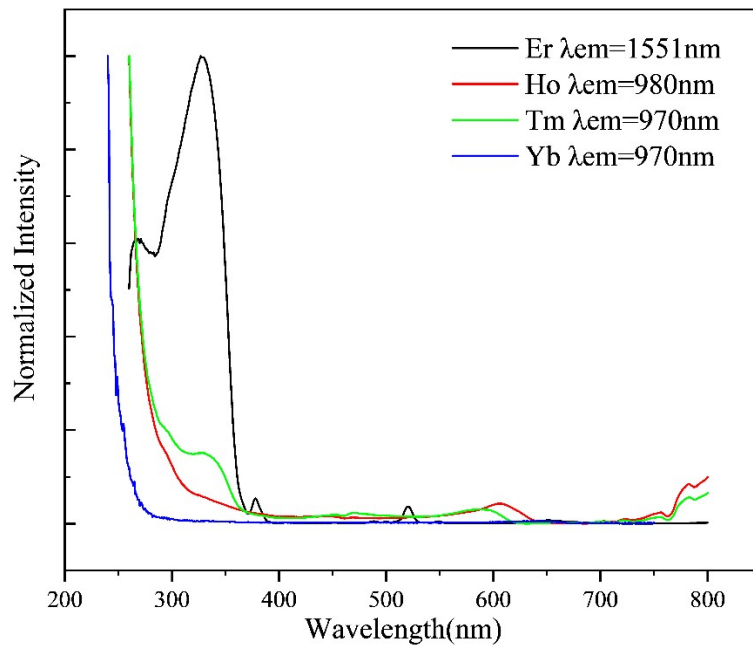

Figure S3. PLE spectra of NCSGO: RE<sup>3+</sup>, RE<sup>3+</sup> = Tm<sup>3+</sup>, Er<sup>3+</sup>, Yb<sup>3+</sup>, Ho<sup>3+</sup>.

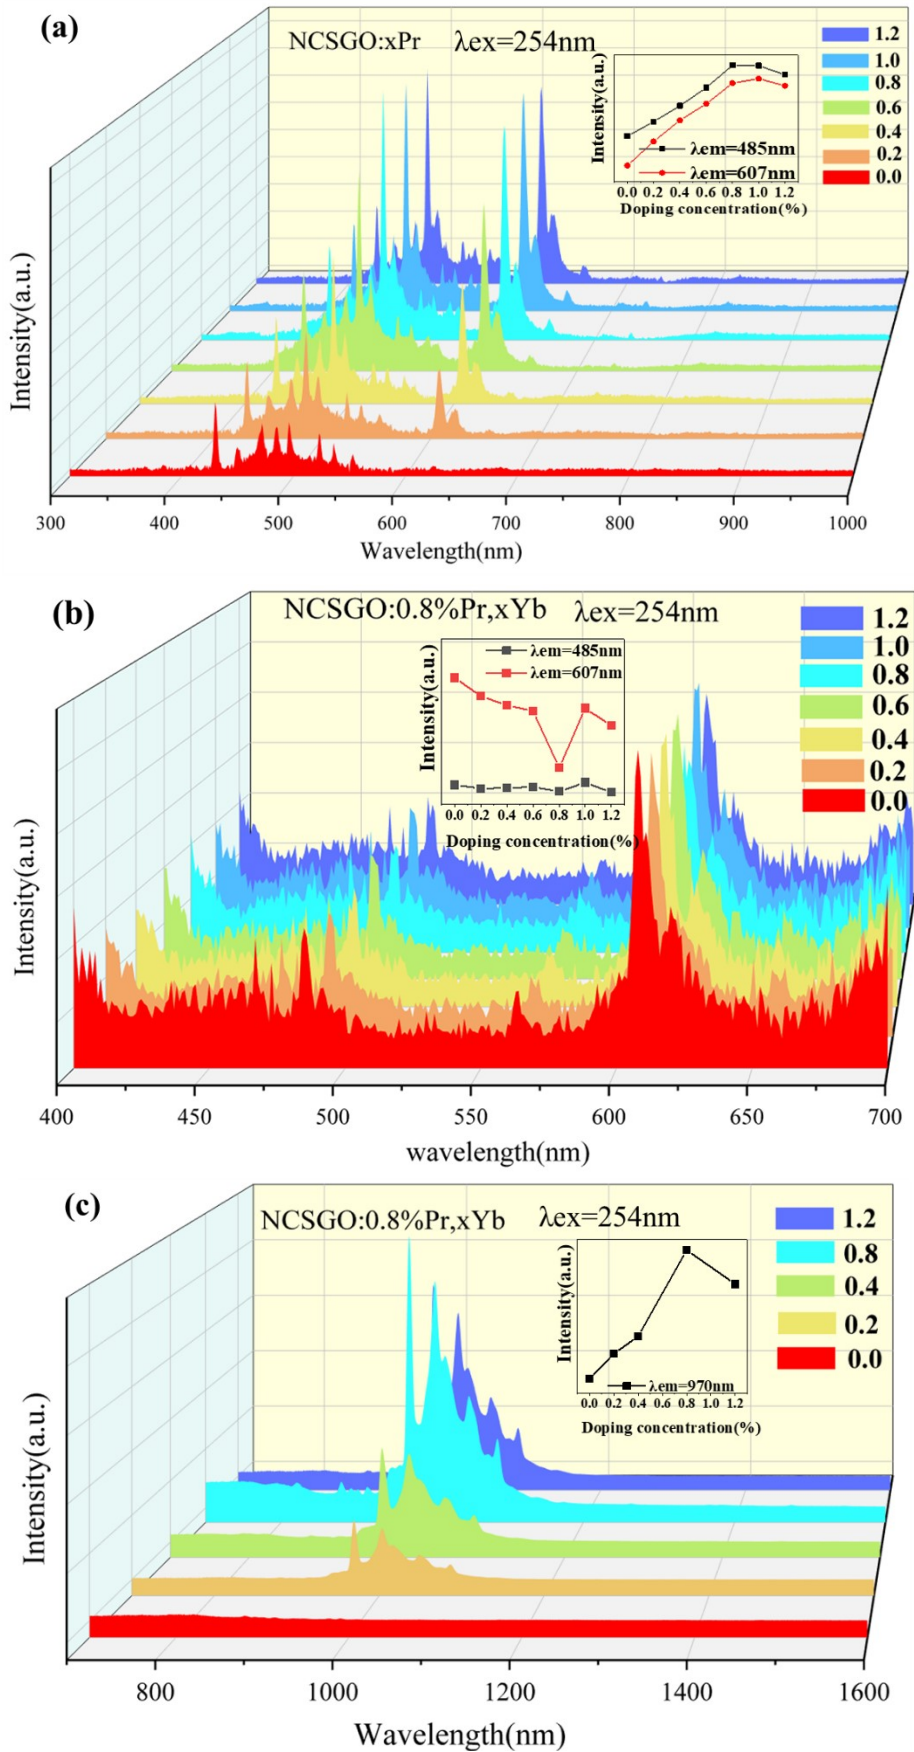

Figure S4. (a) The PL spectra of NCSGO: x%Pr ( $0 \leq x \leq 1.2$ ), (b-c) PL spectra of NCSGO: 0.8%Pr, x%Yb ( $0 \leq x \leq 1.2$ ), the insets are the emission peaks intensity curves as a function of doping concentration.

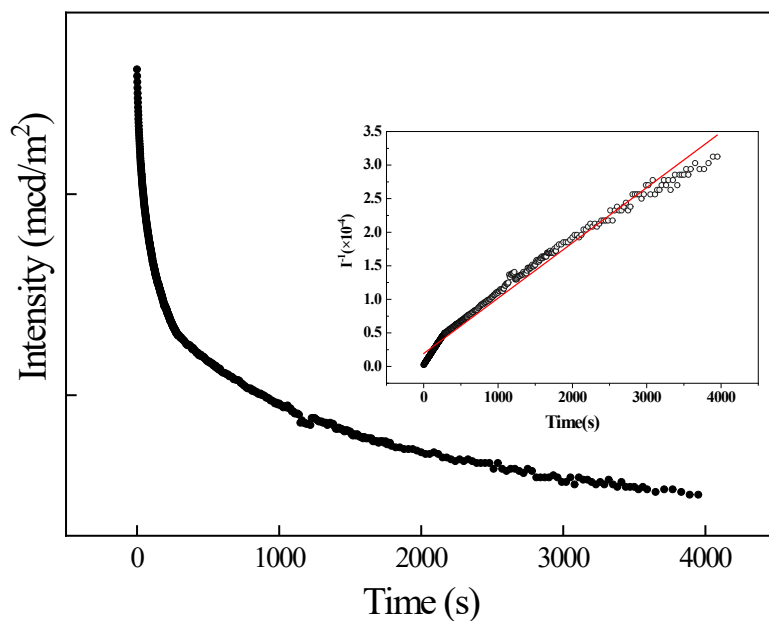

Figure S5. Visible LPL decay curve of NCSGO: 0.8%Pr<sup>3+</sup>, 0.8%Yb<sup>3+</sup>, inset is the reciprocal afterglow intensity ( $I^{-1}$ ) of the visible afterglow as a function of time, the red line was the fitting result.

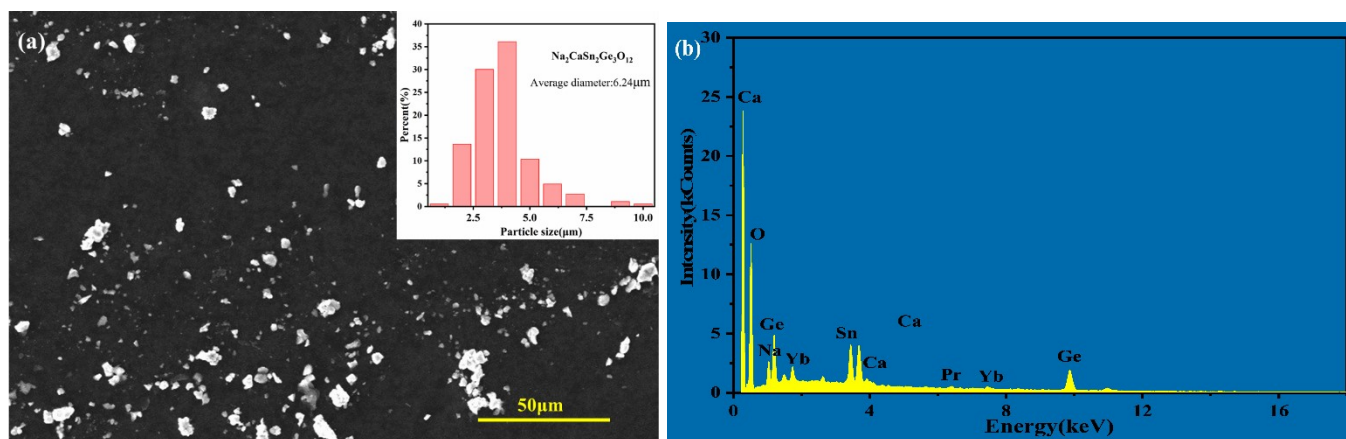

Figure S6. (a) SEM micrograph; the inset shows the particle size distribution, (b) EDX spectrum of NCSGO: 0.8%Pr<sup>3+</sup>, 0.8%Yb<sup>3+</sup>.

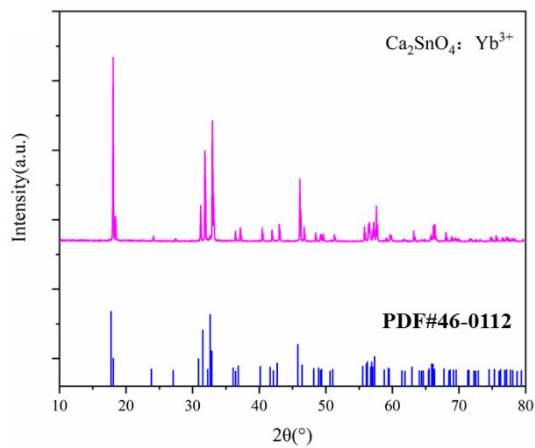

Figure S7. XRD pattern of the sample  $\text{Ca}_2\text{SnO}_4: 1.0\%\text{Yb}^{3+}$

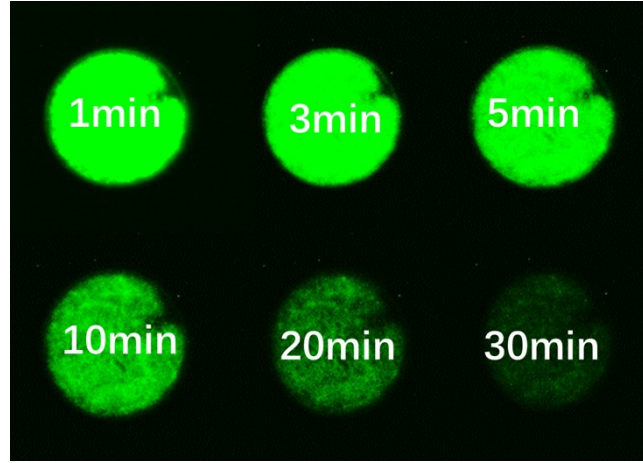

Figure S8. The near-infrared photosensitive images of NCSGO:  $\text{Pr}^{3+}$ ,  $\text{Yb}^{3+}$  at different time after 10min 254nm UV lamp excitation.

Table S1. Distance of  $\text{Pr}^{3+}$  and  $\text{Yb}^{3+}$  after refinement by Rietveld.

| Atom1       | Summetry1 | Atom2       | Summetry2               | Distance(Å) |
|-------------|-----------|-------------|-------------------------|-------------|
| Na Ca Yb Pr | x, y, z   | Na Ca Yb Pr | z, x, y                 | 3.7978      |
| Na Ca Yb Pr | x, y, z   | Na Ca Yb Pr | y, z, x                 | 3.7978      |
| Na Ca Yb Pr | x, y, z   | Na Ca Yb Pr | 0.5-z, -x, 0.5+y        | 3.7978      |
| Na Ca Yb Pr | x, y, z   | Na Ca Yb Pr | 0.25-z, -0.25+y, 0.25+x | 3.7978      |
| Na Ca Yb Pr | x, y, z   | Na Ca Yb Pr | 0.25-y, -0.25+x, 0.25+z | 3.7978      |
| Na Ca Yb Pr | x, y, z   | Na Ca Yb Pr | -y, 0.5-z, x            | 3.7978      |
| Na Ca Yb Pr | x, y, z   | Na Ca Yb Pr | z, -x, 0.5-y            | 3.7978      |
| Na Ca Yb Pr | x, y, z   | Na Ca Yb Pr | 0.25+y, 0.25-x, -0.25+z | 3.7978      |
| Na Ca Yb Pr | x, y, z   | Na Ca Yb Pr | -z, -x, -y              | 5.8012      |
| Na Ca Yb Pr | x, y, z   | Na Ca Yb Pr | -0.25+z, 0.25-y, 0.75-x | 5.8012      |
| Na Ca Yb Pr | x, y, z   | Na Ca Yb Pr | -x, -y, -z              | 6.9338      |

Table S2. TL spectra corresponding peak of NCSGO:  $0.8\%\text{Pr}^{3+}$  and NCSGO:  $0.8\%\text{Pr}^{3+}$ ,  $0.8\%\text{Yb}^{3+}$ .

| Peak( $\text{Pr}^{3+}$ ) | $T_m(\text{K})$ | E(eV) | $n_0$     |
|--------------------------|-----------------|-------|-----------|
| 1                        | 341             | 0.682 | 407892.62 |
| 2                        | 367             | 0.734 | 735667.58 |

  

| Peak( $\text{Pr}^{3+}\text{-Yb}^{3+}$ ) | $T_m(\text{K})$ | E(eV) | $n_0$      |
|-----------------------------------------|-----------------|-------|------------|
| 1                                       | 348             | 0.696 | 1661483.65 |
| 2                                       | 429             | 0.858 | 1746012.61 |
| 3                                       | 483             | 0.966 | 358615.55  |
